# Supplementary material
Source: publisher site journal article supplement (https://www.dovepress.com/article/553011)
Supplement: Supplementary file 1 [file 553011%20Supplementary.docx]

**Supplement to Schnier et al., 2025, Validity of using prescription medications to classify disease – a retrospective observational study using routinely collected electronic health records from the UK, Pragmat Obs Res.**


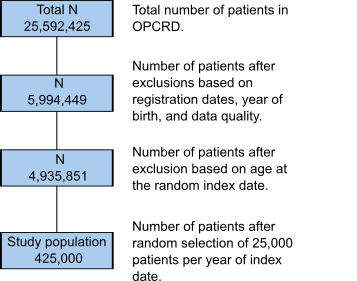


Supplementary Figure 1: Flow chart of patient selection.

Supplementary Table 1: Selected codes for the classification of prescription and diagnosis

| Disease | Prescription | Diagnosis |
| --- | --- | --- |
| Asthma | Whittaker et al.1 | NHLI-SPH Respiratory Electronic Health Records Group2 |
| ILD | bnf code 3.11. (Pirfenidone) and bnf code 0801050BTAAA (Nintedanib)3 | NHLI-SPH Respiratory Electronic Health Records Group2 |
| COPD | NHLI-SPH Respiratory Electronic Health Records2 Group | NHLI-SPH Respiratory Electronic Health Records Group2 |
| Dementia | bnf code 4.11.3 | Knight et al4 |
| Depression | bnf code 4.3.X.3 | Knight et al 5 |
| Anxiety | bnf code 4.1.1. and 4.1.2.3 | Brown and Macdonald6; John et al7 |
| Epilepsy | bnf code 4.8.1. and 4.8.2.3 | QMUL Multimorbidity 8; NHSD Primary Care Domain Refsets9 |
| Mirgaine | bnf code 4.7.4.3 | University of Bristol 10; Gorton et al11 |
| Osteoporosis | bnf code 6.6.1. and 6.6.2.3 | NHSD Primary Care Domain Refsets 12; Kuan et al13 |
| Osteopenia | bnf code 6.6.1. and 6.6.2.3 | ReadCodeBrowser14 |
| Gastro-oesophageal reflux disease | bnf code 1.1.X. and 1.3.1.3 | OPCRD code list |
| Diabetes | bnf code 6.1.X.3 | OPCRD code list |
| Type 1 DM | bnf code 6.1.1.3 | OPCRD code list |
| Type 2 DM | bnf code 6.1.2.3 | OPCRD code list |
| (Congestive) heart failure | Kany et al.15 | Pharmacist led information technology intervention (PINCER 16; HDRUK Phenotype Library17 |
| Hypothyroidism | bnf code 6.2.1.3 | Tomlinson et al18; QOF19 |

1. Whittaker H. Data from: Asthma medications (BNF). 2023. *Oxford, UK*. <https://www.opencodelists.org/codelist/bristol/asthma-medications-bnf/7d1f49e6/download.csv>

2. HLI-SPH Respiratory Electronic Health Records Group. Data from: Harmonisation of curation of respiratory disease datasets across the UK. 2025. *Github*. <https://github.com/NHLI-Respiratory-Epi/Curation-Harmonisation>

3. Joint Formulary Committee. British National Formulary 85. Accessed February 20, 2025, 2025. <https://archive.org/details/british-national-formulary-bnf-85-march-to-september-2023>

4. Knight R, Walker V, Ip S, et al. Data from: CCU002_01 Dementia / PH963. 2022. <https://phenotypes.healthdatagateway.org/phenotypes/PH963/version/2141/detail/>

5. Knight R, Walker V, Ip S, et al. Data from: CCU002_01 Depression / PH964. 2022. <https://phenotypes.healthdatagateway.org/phenotypes/PH964/version/2142/detail/>

6. Brown A, Macdonald O. Data from: Anxiety Disorders. 2022. *Oxford*. <https://www.opencodelists.org/codelist/opensafely/anxiety-disorders/6aef605a/download.csv>

7. John A, McGregor J, Fone D, et al. Data from: PH1113 / 3477 - Anxiety. *HDRUK Phenotype Library*. Deposited December 3, 2024. <https://phenotypes.healthdatagateway.org/phenotypes/PH1113/version/3477/detail/>

8. QMUL Multimorbidity. Data from: Epilepsy. 2020. *Oxford, UK*. Deposited 25.11.2020. <https://www.opencodelists.org/codelist/qmul-multimorbidity/epilepsy/04956360/download.csv>

9. NHSD Primary Care Domain Refsets. Data from: Epilepsy diagnosis codes. 2024. *Oxford, UK*. Deposited 24.12.2024. <https://www.opencodelists.org/codelist/nhsd-primary-care-domain-refsets/epil_cod/20241205/download.csv>

10. University of Bristol. Data from: Migraine (Snomed-CT). 2019;V1.3. *Oxford, UK*. Deposited July 24, 2023. <https://www.opencodelists.org/codelist/bristol/migraine-snomed-ct-v13/1625541f/download.csv>

11. Gorton HC, Webb RT, Carr MJ, Delpozo-Banos M, John A, Ashcroft DM. Data from: PH469 / 938 - Migraine. 2022. *Swansea, UK*. Deposited 06.10.2021. <https://phenotypes.healthdatagateway.org/phenotypes/PH469/version/938/detail/>

12. NHSD Primary Care Domain Refsets. Data from: Osteoporosis codes. 2024. *Oxford, UK*. Deposited 24.12.2024. <https://www.opencodelists.org/codelist/nhsd-primary-care-domain-refsets/osteo_cod/20241205/download.csv>

13. Kuan V, Denaxas S, Gonzalez-Izquierdo A, et al. Data from: PH225 / 450 - Osteoporosis. 2021. *Swansea, UK*. Deposited 06.10.2021. <https://phenotypes.healthdatagateway.org/phenotypes/PH225/version/450/detail/>

14. NHS TRUD. Data from: NHS Read Browser. 2018;25.0.0_20180401000001. <https://isd.digital.nhs.uk/trud/users/guest/filters/0/categories/9/items/8/releases?source=summary>

15. Kany S, Cardoso VR, Bravo L, et al. Eligibility for early rhythm control in patients with atrial fibrillation in the UK Biobank. *Heart*. Nov 10 2022;108(23):1873-1880. doi:10.1136/heartjnl-2022-321196

16. Pharmacist led information technology intervention (PINCER). Data from: Heart Failure. 2021. *HDRUK Phenotype Library*. Deposited 09.08.2021. <https://www.opencodelists.org/codelist/pincer/hf/v1.8/download.csv>

17. Metcalfe D, Masters J, Delmestri A, et al. Data from: PH1055 / 2313 - Congestive heart failure - Charlson primary care. 2023. *Swansea, UK*. Deposited February 13, 2023. <https://phenotypes.healthdatagateway.org/phenotypes/PH1055/version/2313/detail/>

18. Tomlinson L, Schultze A. Data from: Heart Failure. 2020. *HDRUK Phenotype Library*. Deposited May 05, 2020. <https://www.opencodelists.org/codelist/opensafely/heart-failure/2020-05-05/download.csv>

19. Quality and Outcomes framework Business rules v24. Data from: Code list: Hypothyroidism. 2021;v24. *Manchester*. Deposited 09.08.2021. <https://clinicalcodes.rss.mhs.man.ac.uk/medcodes/article/1/codelist/hypothyroidism/download/>
